# Supplementary material for: Effects of Atrazine on Estrogen Receptor α– and G Protein–Coupled Receptor 30–Mediated Signaling and Proliferation in Cancer Cells and Cancer-Associated Fibroblasts
Source: PubMed Central journal article supplement (PMC4421771; doi:10.1289/ehp.1408586), 2015-01-16
Supplement: ehp.1408586.s001.508.pdf [file ehp.1408586.s001.508.pdf]

**Supplemental Material**

**Effects of Atrazine on Estrogen Receptor  $\alpha$ - and G Protein-Coupled  
Receptor 30-Mediated Signaling and Proliferation in Cancer Cells  
and Cancer-Associated Fibroblasts**

Lidia Albanito, Rosamaria Lappano, Antonio Madeo, Adele Chimento, Eric R. Prossnitz, Anna  
Rita Cappello, Vincenza Dolce, Sergio Abonante, Vincenzo Pezzi, and Marcello Maggiolini

**Table S1.** Sequences of primers used for RT-PCR.

| <b>Gene</b> | <b>Primer Fw</b>         | <b>Primer Rv</b>         | <b>Yield products (bp)</b> |
|-------------|--------------------------|--------------------------|----------------------------|
| c-fos       | AGAAAAGGAGAATCCGAAGGGAAA | ATGATGCTGGGACAGGAAGTC    | 345                        |
| CTGF        | ATGGCATGAAGCCAGAGAGT     | GGTCAGTGAGCACGCTAAAA     | 420                        |
| PR          | ACACCTTGCCTGAAGTTTCG     | CTGTCCTTTTCTGGGGGACT     | 196                        |
| pS2         | TTCTATCCTAATACCATCGACG   | TTTGAGTAGTCAAAGTCAGAGC   | 210                        |
| CathepsinD  | AACAACAGGGTGGGCTTC       | ATGCACGAAACAGATCTGTGCT   | 303                        |
| CyclinA     | GCCATTAGTTTACCTGGACCCAGA | GCCATTAGTTTACCTGGACCCAGA | 354                        |
| CyclinD1    | TCTAAGATGAAGGAGACCATC    | GCGGTAGTAGGACAGGAAGTTGTT | 354                        |
| CyclinE     | CCTGACTATTGTGTCCTGGC     | CCCGCTGCTCTGCTTCTTAC     | 488                        |
| 36B4        | CTCAACATCTCCCCCTTCTC     | CAAATCCCATATCCTCGTCC     | 408                        |

**Table S2.** mRNA expression (% variation  $\pm$  SD) as evaluated by densitometric analysis in BG-1 cells treated for 1 hr or 24 hr with 100 nmol/L E2 and 1  $\mu$ mol/L atrazine (Atr).

| <b>Gene</b>       | <b>E2<br/>(1hr)</b> | <b>E2<br/>(24hr)</b> | <b>Atr<br/>(1hr)</b> | <b>Atr<br/>(24hr)</b> |
|-------------------|---------------------|----------------------|----------------------|-----------------------|
| <i>c-fos</i>      | 423 $\pm$ 28*       | 239 $\pm$ 17*        | 269 $\pm$ 21*        | 120 $\pm$ 9           |
| <i>CTGF</i>       | 498 $\pm$ 22*       | 120 $\pm$ 19         | 320 $\pm$ 17*        | 125 $\pm$ 12          |
| <i>PR</i>         | 228 $\pm$ 18*       | 298 $\pm$ 18*        | 122 $\pm$ 18         | 180 $\pm$ 11*         |
| <i>pS2</i>        | 175 $\pm$ 17*       | 270 $\pm$ 21*        | 99 $\pm$ 19          | 187 $\pm$ 20*         |
| <i>CathepsinD</i> | 106 $\pm$ 9         | 217 $\pm$ 16*        | 102 $\pm$ 5          | 109 $\pm$ 6           |
| <i>CyclinA</i>    | 262 $\pm$ 22*       | 293 $\pm$ 23*        | 220 $\pm$ 20*        | 190 $\pm$ 22*         |
| <i>CyclinD1</i>   | 258 $\pm$ 19*       | 242 $\pm$ 19*        | 107 $\pm$ 4          | 118 $\pm$ 8           |
| <i>CyclinE</i>    | 120 $\pm$ 11        | 343 $\pm$ 21*        | 118 $\pm$ 8          | 119 $\pm$ 10          |

Values in cells treated with vehicle were set as 100% and the expression induced by treatments is presented as percentage variation. The significant difference ( $p < 0.05$ ) of values obtained upon E2 or Atr treatments respect to vehicle was marked with an asterisk (\*).

**Table S3.** mRNA expression (% variation  $\pm$  SD) as evaluated by densitometric analysis in BG-1 cells treated for 1 hr or 24 hr with 100nmol/L E2 and 1 $\mu$ mol/L atrazine (Atr) alone and in combination with 1 $\mu$ mol/L c-Src inhibitor (PP2).

| Gene           | E2<br>(1 hr)  | E2 + PP2<br>(1 hr) | E2<br>(24 hr) | E2 + PP2<br>(24 hr) | Atr<br>(1 hr) | Atr + PP2<br>(1 hr) | Atr<br>(24 hr) | Atr + PP2<br>(24 hr) |
|----------------|---------------|--------------------|---------------|---------------------|---------------|---------------------|----------------|----------------------|
| <i>PR</i>      | 203 $\pm$ 15* | 152 $\pm$ 6**      | 251 $\pm$ 22* | 180 $\pm$ 12**      | 110 $\pm$ 9   | 115 $\pm$ 11        | 172 $\pm$ 8*   | 188 $\pm$ 13*        |
| <i>pS2</i>     | 182 $\pm$ 15* | 139 $\pm$ 10**     | 290 $\pm$ 25* | 205 $\pm$ 16**      | 105 $\pm$ 16  | 111 $\pm$ 10        | 168 $\pm$ 17*  | 170 $\pm$ 9*         |
| <i>CyclinA</i> | 247 $\pm$ 20* | 183 $\pm$ 16**     | 275 $\pm$ 21* | 210 $\pm$ 18**      | 215 $\pm$ 17* | 210 $\pm$ 14*       | 178 $\pm$ 19*  | 161 $\pm$ 9*         |

Values in cells treated with vehicle were set as 100% and the expression induced by treatments is presented as percentage variation. The significant difference ( $p < 0.05$ ) of values obtained upon E2 or Atr treatments respect to vehicle was marked with an asterisk (\*). The significant difference ( $p < 0.05$ ) of values obtained using E2 in combination with PP2 respect to E2 alone was marked with a double asterisk (\*\*).

**Figure S1**

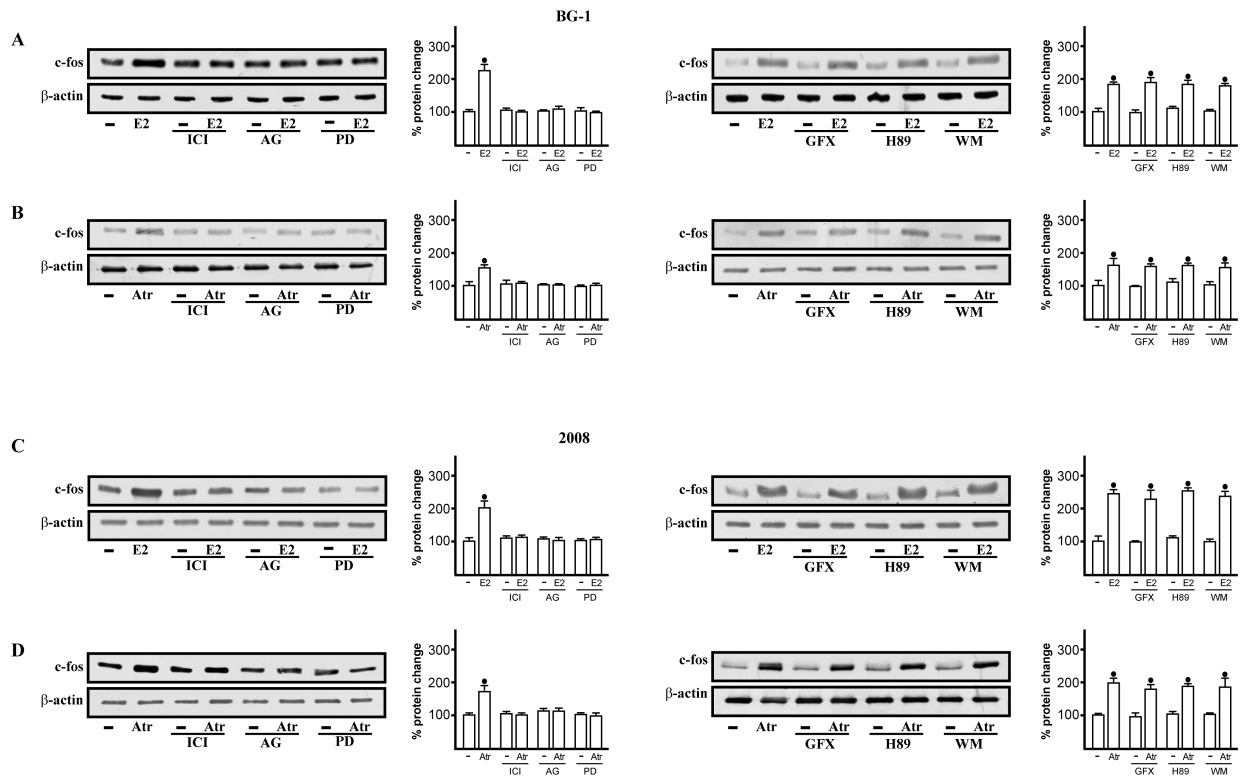

**Figure S1.** Immunoblots of c-fos from BG-1 (A,B) and 2008 (C,D) cells treated for 2hr as indicated with vehicle (-), 100nmol/L E2, 1μmol/L atrazine (Atr), 10μmol/L ICI, 10μmol/L AG, 10μmol/L PD, 10μmol/L GFX, 10μmol/L H89, 10μmol/L WM, which are inhibitors of ER, EGFR, MEK, PKC, PKA and PI3K, respectively. Side panels show densitometric analysis of the immunoblots. Data shown are representative of three independent experiments. Data obtained were normalized to β-actin. (•) indicates  $p < 0.05$  for cells receiving vehicle (-) versus treatments.

**Figure S2**

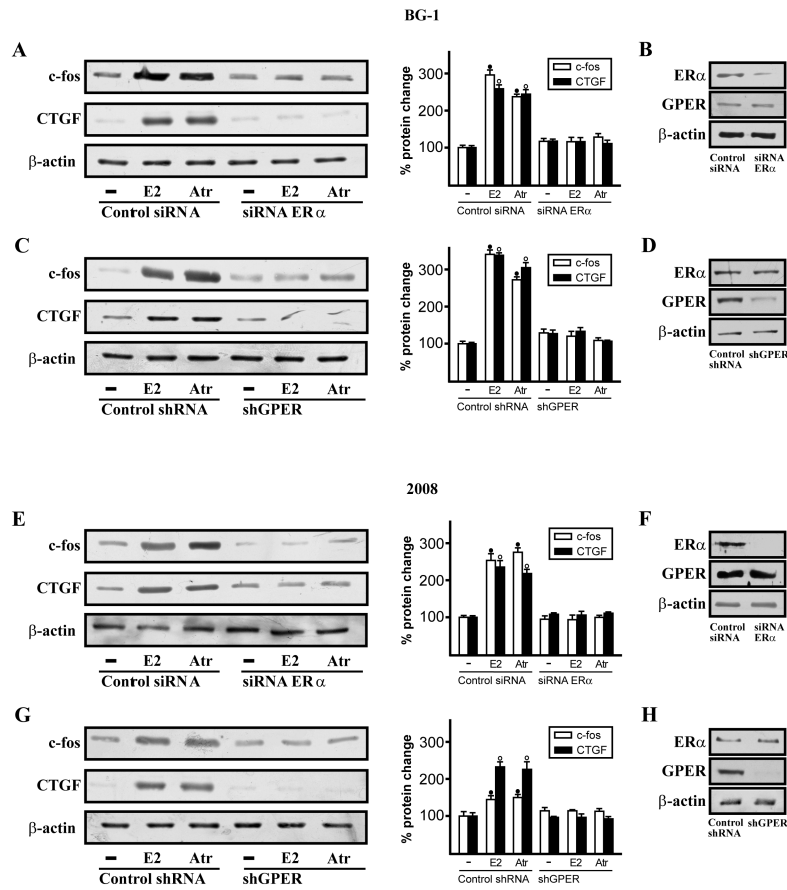

Supplemental Material, Figure S2

**Figure S2.** Immunoblots of c-fos and CTGF from BG-1 (A,C) and 2008 (E,G) cells silenced for ER $\alpha$  and GPER expression. Cells were transfected with control siRNA or siRNA-ER $\alpha$  (A,E), with control shRNA or shGPER (C,G) and then treated for 2hr with vehicle (-), 100nmol/L E2 and 1 $\mu$ mol/L atrazine (Atr). Side panels show densitometric analysis of the immunoblots. Data shown are representative of three independent experiments. Data obtained were normalized to  $\beta$ -actin. The efficacy of ER $\alpha$  and GPER silencing was ascertained by immunoblots (B,D,F,H). Data obtained were normalized to  $\beta$ -actin. (●) and (○) indicate p < 0.05 for cells receiving vehicle (-) versus treatments.

**Figure S3**

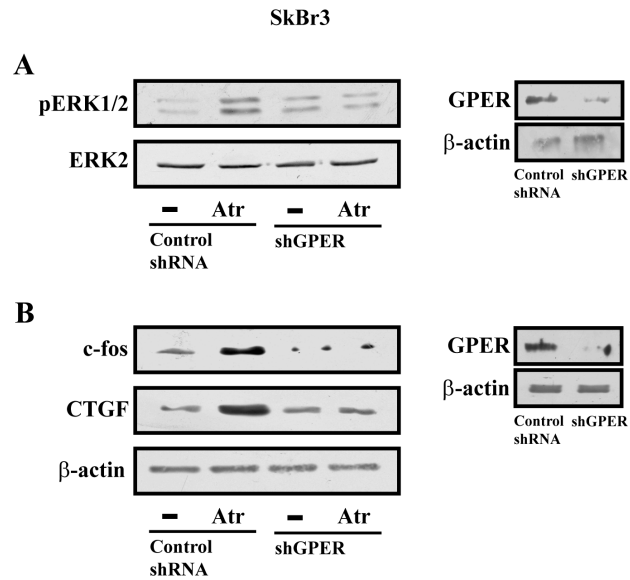

**Figure S3.** ERK1/2 phosphorylation (A) and c-fos and CTGF expression (B) silencing GPER expression in SkBr3 cells treated with vehicle (-) and 1  $\mu$ mol/L atrazine (Atr). The efficacy of GPER silencing was ascertained by immunoblots, as shown in side panels. ERK2 and  $\beta$ -actin serve as loading controls. Data shown are representative of three independent experiments.

**Figure S4**

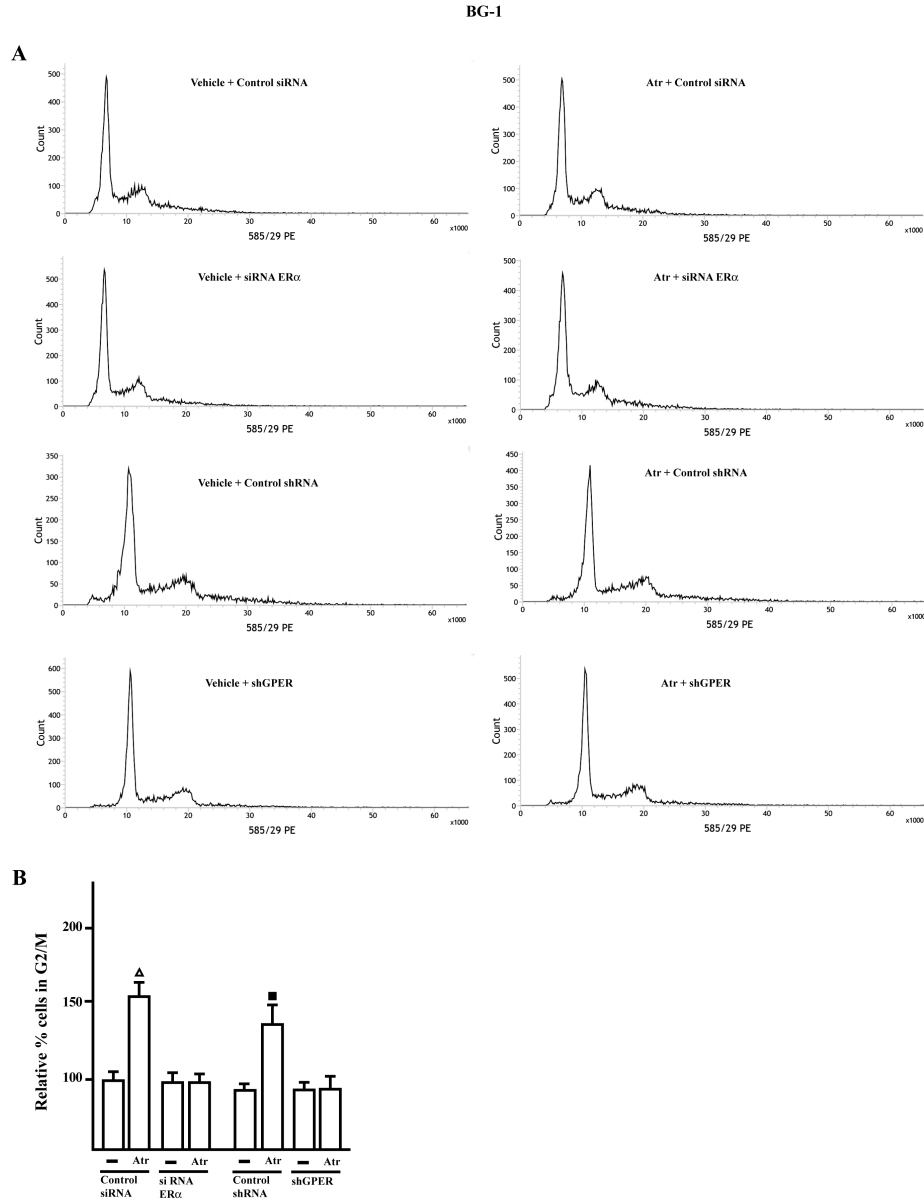

**Figure S4.** (A) BG-1 cells were transfected with control siRNA or siRNA ER $\alpha$  and with control shRNA or shGER, treated with vehicle (–) and 1  $\mu$ mol/L atrazine (Atr) and then analyzed for the cell-cycle profile. Cell populations positive for propidium iodine staining were evaluated by FACS analysis. Panels show the cell cycle profile of a representative experiment. (B) The percentage of cells in G2/M phase is indicated, values are the mean  $\pm$  SD of three independent experiments. ( $\Delta$ ,  $\blacksquare$ ) indicate  $p < 0.05$  for cells receiving vehicle (–) versus treatments.



**Figure S5**

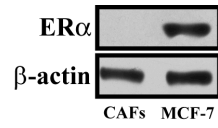

**Figure S5.** Western blot analysis of ER $\alpha$  protein expression in CAFs and MCF-7 breast cancer cells. Data shown are representative of three independent experiments.  $\beta$ -Actin antibody was used as loading control.
